# Supplementary material for: Monte Carlo study of chemical reaction equilibria in pores of activated carbons
Source: Royal Society of Chemistry journal article supplement (doi:10.1039/c7ra08992a), 2017-01-01
Supplement: c7ra08992a1.pdf [file c7ra08992a1.pdf]

**Electronic Supplementary Information**  
**for**  
**Monte Carlo study of chemical reactions equilibria**  
**in pores of activated carbons**

Sylwester Furmaniak, Piotr A. Gauden, Piotr Kowalczyk,  
Andrzej Patrykiewicz

**number of pages: 7**

**number of tables: 1**

**number of figures: 6**

**Table S1**

Criteria of acceptance for different trial moves ( $N_i$  – the number of  $i$ -th kind of molecules,  $T$  – temperature,  $k_B$  – Boltzmann constant,  $V$  – volume of the simulation box,  $\Delta U$  – the change in configurational energy,  $\Gamma$  – reaction quotient,  $Z_i$  – the activity of  $i$ -th component ( $Z_i = p_i/k_B T$  and  $p_i$  is the pressure of  $i$ -th component in the bulk phase); we have assumed the ideality of the gases).

| displacement of random molecule                                                                                       | reaction steps (dimerization)                                                                                            |
|-----------------------------------------------------------------------------------------------------------------------|--------------------------------------------------------------------------------------------------------------------------|
| $P_{acc} = \min \left\{ 1; \exp \left[ -\frac{\Delta U}{k_B T} \right] \right\}$                                      | - forward ( $A + A \rightarrow B$ )                                                                                      |
| creation of molecule of $i$ -th kind                                                                                  | $P_{acc} = \min \left\{ 1; \frac{\Gamma (N_A - 1) N_A}{V N_B + 1} \exp \left[ -\frac{\Delta U}{k_B T} \right] \right\}$  |
| $P_{acc} = \min \left\{ 1; \frac{Z_i V}{N_i + 1} \exp \left[ -\frac{\Delta U}{k_B T} \right] \right\}$                | - backward ( $B \rightarrow A + A$ )                                                                                     |
| annihilation of molecule of $i$ -th kind                                                                              | $P_{acc} = \min \left\{ 1; \frac{V N_B}{\Gamma (N_A + 1)(N_A + 2)} \exp \left[ -\frac{\Delta U}{k_B T} \right] \right\}$ |
| $P_{acc} = \min \left\{ 1; \frac{N_i}{Z_i V} \exp \left[ -\frac{\Delta U}{k_B T} \right] \right\}$                    |                                                                                                                          |
| reaction steps (isomerization)                                                                                        | reaction steps (synthesis)                                                                                               |
| - forward ( $A \rightarrow B$ )                                                                                       | - forward ( $A + B \rightarrow C$ )                                                                                      |
| $P_{acc} = \min \left\{ 1; \Gamma \frac{N_A}{N_B + 1} \exp \left[ -\frac{\Delta U}{k_B T} \right] \right\}$           | $P_{acc} = \min \left\{ 1; \frac{\Gamma N_A N_B}{V N_C + 1} \exp \left[ -\frac{\Delta U}{k_B T} \right] \right\}$        |
| - backward ( $B \rightarrow A$ )                                                                                      | - backward ( $C \rightarrow A + B$ )                                                                                     |
| $P_{acc} = \min \left\{ 1; \frac{1}{\Gamma} \frac{N_B}{N_A + 1} \exp \left[ -\frac{\Delta U}{k_B T} \right] \right\}$ | $P_{acc} = \min \left\{ 1; \frac{V N_C}{\Gamma (N_A + 1)(N_B + 1)} \exp \left[ -\frac{\Delta U}{k_B T} \right] \right\}$ |

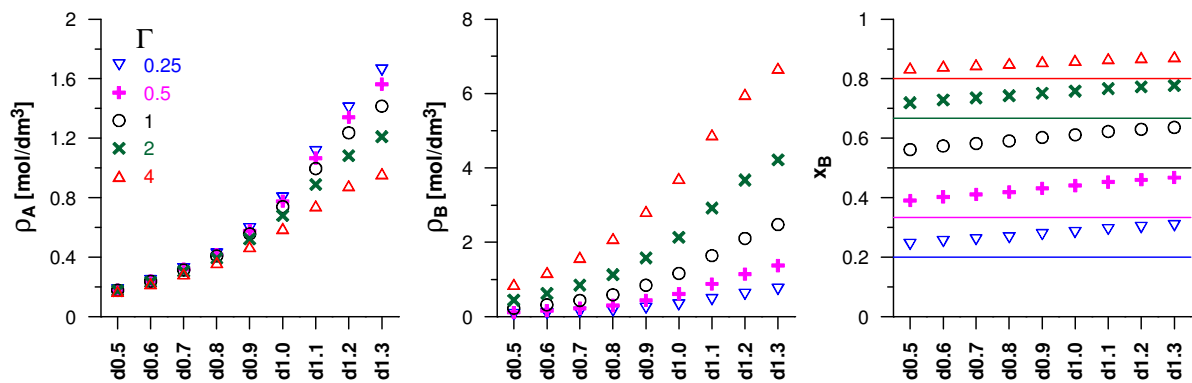

**Figure S1.** The comparison of the composition of the reacting phase ( $T = 298$  K) in pores of all the considered VPCs for the isomerisation reaction ( $A \leftrightarrow B$ ). The data corresponding to different values of the reaction constant ( $\Gamma$ ) and the same value of the potential well depth for the product molecules ( $\epsilon_{BB}/k_B = 120$  K) have been shown. The subsequent panels present the average densities of the reactant ( $\rho_A$ ) and the product ( $\rho_B$ ) in pores (the densities have been calculated per the volume of accessible pores) and the mole fraction of the product in the mixture ( $x_B$ ). The  $x_B$  mole fractions for the reactions in the bulk phase are shown as horizontal solid lines.

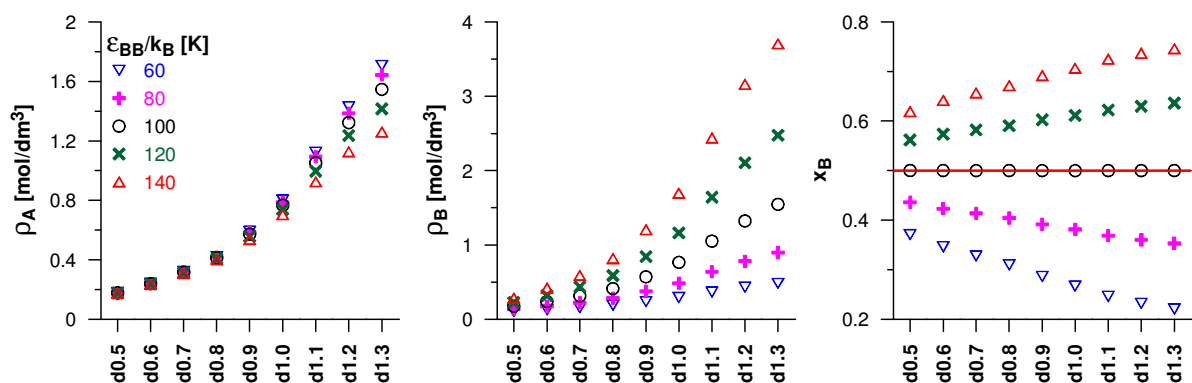

**Figure S2.** As in Figure S1, but for the fixed value of the equilibrium constant ( $\Gamma = 1$ ) and different values of the potential well depth for product molecules ( $\epsilon_{BB}$ ). The horizontal lines present the  $x_B$  mole fraction in the bulk phase (it should be noted that these lines are overlapped).

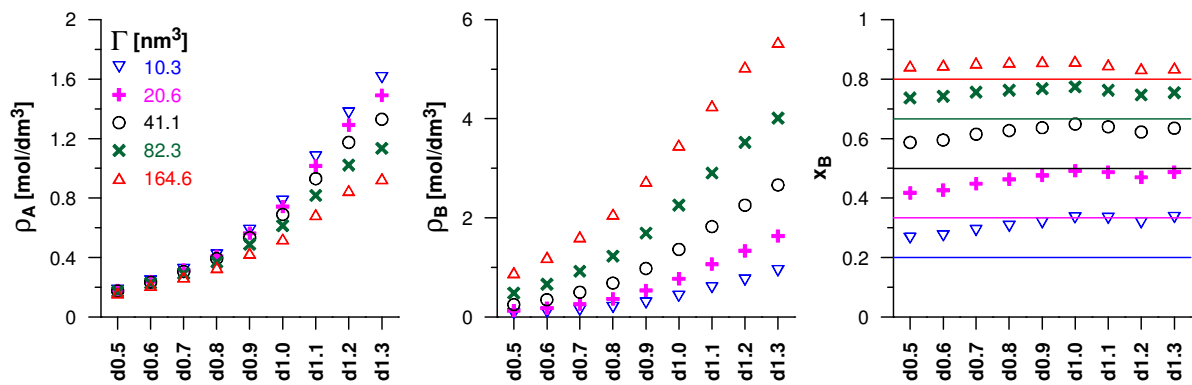

**Figure S3.** As in Figure S1 but for the dimerisation reaction ( $A+A \leftrightarrow B$ ). The data for different values of the reaction constant ( $\Gamma$ ) and the same value of the potential well depth for the product molecules ( $\epsilon_{BB}/k_B = 72$  K) have been shown. The  $x_B$  mole fractions for the reactions in the bulk phase have been shown as horizontal solid lines.

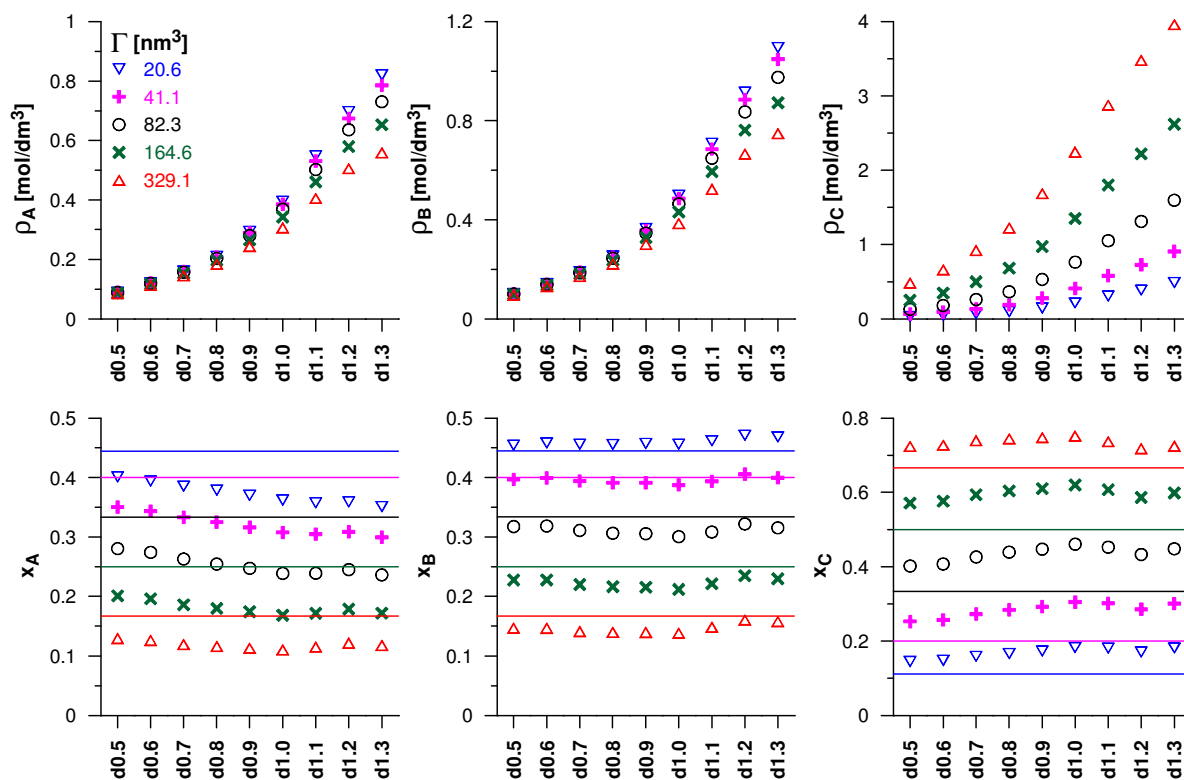

**Figure S4.** As in Figure S1 but for the synthesis reaction ( $A+B \leftrightarrow C$ ). The data presented correspond to the different values of the reaction constant ( $\Gamma$ ) and the fixed values of the potential well depth for the reactant B ( $\epsilon_{BB}/k_B = 110$  K) and the product ( $\epsilon_{CC}/k_B = 72$  K). The reactants pressure in the bulk phase have been taken as  $p_A = p_B = 0.05$  MPa. The upper panels present the average densities of the reacting species ( $\rho_A$ ,  $\rho_B$  and  $\rho_C$ ). The lower panels show their mole fractions in the mixture ( $x_A$ ,  $x_B$  and  $x_C$ ). The mole fractions for the reaction taking place in the bulk phase are marked by horizontal lines.

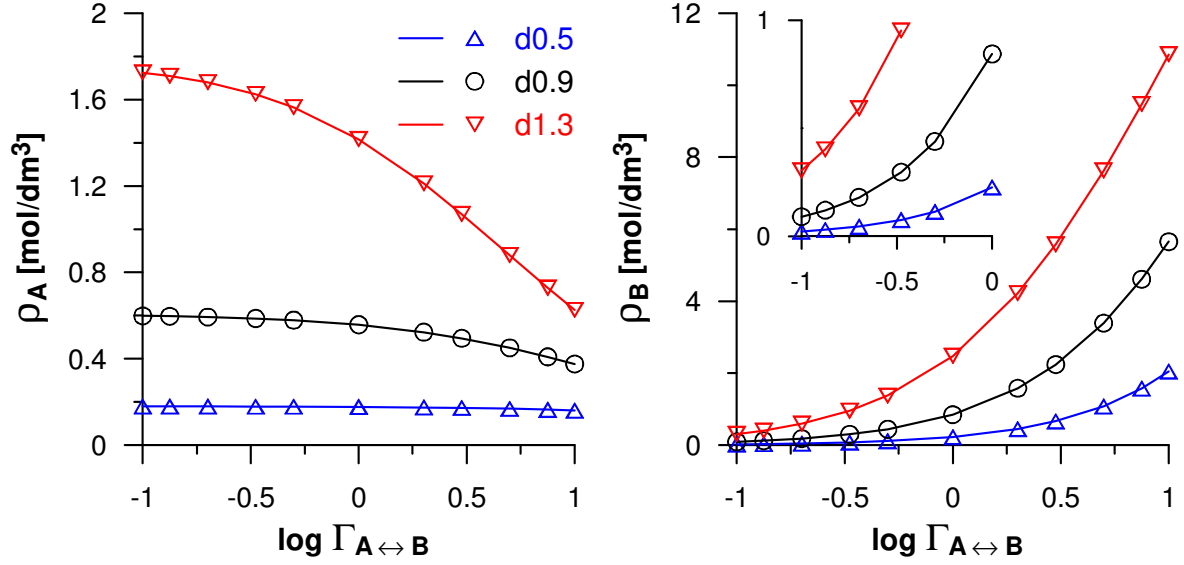

**Figure S5.** The average densities of the reacting molecules for the isomerisation reaction ( $A \leftrightarrow B$ ) in the selected VPCs as the functions of the equilibrium constant in the logarithmic scale ( $\epsilon_{BB}/k_B = 120$  K). Two cases have been considered: (i) the molecules of A have been created and annihilated in the pores according to the GCMC moves (adsorption from gaseous phase), while the B molecules have been formed or destroyed only via the reaction step (the data presented as lines) and (ii) the B molecules could be adsorbed, while the molecules of A have been created or destroyed only during the reaction (the data presented as points). In the case (i)  $p_A = 0.1$  MPa for all the systems, and in the case (ii)  $p_B = \Gamma_{A \leftrightarrow B} \times p_A$  ( $p_A = 0.1$  MPa).

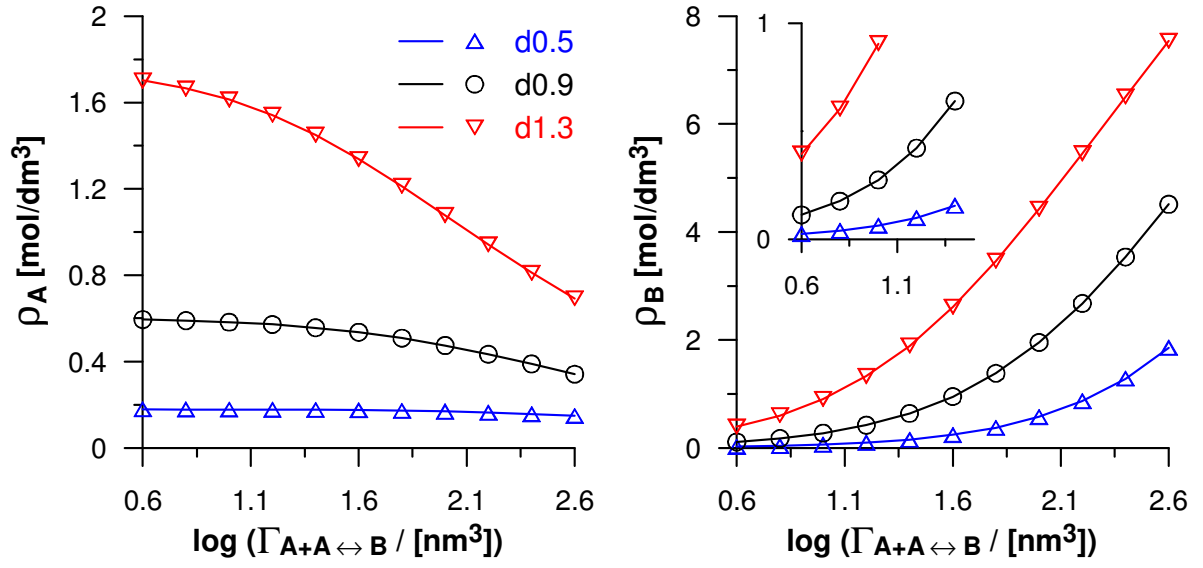

**Figure S6.** As in Figure S5 but for the dimerisation reaction ( $A+A \leftrightarrow B$ ;  $\varepsilon_{BB}/k_B = 72$  K). In the case of the adsorption of B molecules (points),  $p_B = \Gamma_{A+A \leftrightarrow B} \times p_A^2 / (k_B \times T)$  and  $p_A = 0.1$  MPa.
